# Supplementary material for: A Computational Approach to Estimate Interorgan Metabolic Transport in a Mammal
Source: PLoS One. 2014 Jun 27;9(6):e100963. doi: 10.1371/journal.pone.0100963 (PMC4074118; doi:10.1371/journal.pone.0100963)
Supplement: Table S6 — All transportable processes involved in tissue-specific metabolism/transport clusters. Column 1 and 2 are the metabolite name and KEGG ID. Column 3 indicates the organ where metabolite is predicted to be transported. Column 4 shows the class that this transport process belongs to (coupled (class 1) or isolate (class 2)). Column 5 and 6 are the highest expression score and the corresponding slc that mediates the metabolite. (XLS) [file pone.0100963.s013.xls]

## Sheet: trans_types
Transportable Metabolite	KEGG ID	Tissue	Highest Score	Class	Slc Involved
Linoleate	cpd:C01595	Mouse liver	8.4809	1	Slc27a5
Tetradecanoic acid	cpd:C06424	Mouse liver	8.4809	1	Slc27a5
Hexadecanoic acid	cpd:C00249	Mouse liver	8.4809	1	Slc27a5
Arachidonate	cpd:C00219	Mouse liver	8.4809	1	Slc27a5
Linoleate	cpd:C01595	Mouse kidney	8.31746	1	Slc27a2
Hexadecanoic acid	cpd:C00249	Mouse kidney	8.31746	1	Slc27a2
Arachidonate	cpd:C00219	Mouse kidney	8.31746	1	Slc27a2
alpha-D-Glucose	cpd:C00267	Mouse small intestine	7.99389	1	Slc5a1
D-Galactose	cpd:C00124	Mouse small intestine	7.99389	1	Slc5a1
D-Glucose	cpd:C00031	Mouse small intestine	7.99389	1	Slc5a1
L-Aspartate	cpd:C00049	Mouse kidney	7.92846	1	Slc7a13
L-Glutamate	cpd:C00025	Mouse kidney	7.92846	1	Slc7a13
Glycocholate	cpd:C01921	Mouse liver	7.56105	1	Slc10a1
Taurocholate	cpd:C05122	Mouse liver	7.56105	1	Slc10a1
Cholic acid	cpd:C00695	Mouse liver	7.56105	1	Slc10a1
L-Lysine	cpd:C00047	Mouse liver	7.2464	1	Slc38a4
L-Alanine	cpd:C00041	Mouse liver	7.2464	1	Slc38a4
L-Histidine	cpd:C00135	Mouse liver	7.2464	1	Slc38a4
L-Serine	cpd:C00065	Mouse liver	7.2464	1	Slc38a4
L-Arginine	cpd:C00062	Mouse liver	7.2464	1	Slc38a4
L-Glutamine	cpd:C00064	Mouse liver	7.2464	1	Slc38a4
L-Methionine	cpd:C00073	Mouse liver	7.2464	1	Slc38a4
L-Cysteine	cpd:C00097	Mouse liver	7.2464	1	Slc38a4
Glycine	cpd:C00037	Mouse liver	7.2464	1	Slc38a4
alpha-D-Glucose	cpd:C00267	Mouse liver	7.18862	1	Slc2a2
beta-D-Fructose	cpd:C02336	Mouse liver	7.18862	1	Slc2a2
D-Glucosamine	cpd:C00329	Mouse liver	7.18862	1	Slc2a2
D-Fructose	cpd:C00095	Mouse liver	7.18862	1	Slc2a2
D-Galactose	cpd:C00124	Mouse liver	7.18862	1	Slc2a2
D-Glucose	cpd:C00031	Mouse liver	7.18862	1	Slc2a2
Estradiol-17beta 3-glucuronide	cpd:C05503	Mouse liver	7.06896	1	Slco1b2
L-Lysine	cpd:C00047	Mouse placenta	7.04202	1	Slc38a4
L-Histidine	cpd:C00135	Mouse placenta	7.04202	1	Slc38a4
L-Serine	cpd:C00065	Mouse placenta	7.04202	1	Slc38a4
L-Arginine	cpd:C00062	Mouse placenta	7.04202	1	Slc38a4
L-Glutamine	cpd:C00064	Mouse placenta	7.04202	1	Slc38a4
L-Cysteine	cpd:C00097	Mouse placenta	7.04202	1	Slc38a4
Glycine	cpd:C00037	Mouse placenta	7.04202	1	Slc38a4
L-Ornithine	cpd:C00077	Mouse small intestine	6.91834	1	Slc7a9
L-Arginine	cpd:C00062	Mouse small intestine	6.91834	1	Slc7a9
alpha-D-Glucose	cpd:C00267	Mouse kidney	6.74887	1	Slc2a2
beta-D-Fructose	cpd:C02336	Mouse kidney	6.74887	1	Slc2a2
D-Fructose	cpd:C00095	Mouse kidney	6.74887	1	Slc2a2
D-Galactose	cpd:C00124	Mouse kidney	6.74887	1	Slc2a2
D-Glucose	cpd:C00031	Mouse kidney	6.74887	1	Slc2a2
beta-D-Fructose	cpd:C02336	Mouse small intestine	6.65495	1	Slc2a2
D-Glucosamine	cpd:C00329	Mouse small intestine	6.65495	1	Slc2a2
D-Mannose	cpd:C00159	Mouse small intestine	6.65495	1	Slc2a2
D-Fructose	cpd:C00095	Mouse small intestine	6.65495	1	Slc2a2
Succinate	cpd:C00042	Mouse kidney	6.58449	1	Slc22a7
Prostaglandin E2	cpd:C00584	Mouse kidney	6.58449	1	Slc22a7
L-Lysine	cpd:C00047	Mouse kidney	6.38552	1	Slc7a9
L-Ornithine	cpd:C00077	Mouse kidney	6.38552	1	Slc7a9
L-Arginine	cpd:C00062	Mouse kidney	6.38552	1	Slc7a9
Dopamine	cpd:C03758	Mouse kidney	6.37994	1	Slc22a2
Serotonin	cpd:C00780	Mouse kidney	6.37994	1	Slc22a2
Estradiol-17beta	cpd:C00951	Mouse kidney	6.37994	1	Slc22a2
L-Alanine	cpd:C00041	Mouse small intestine	6.30811	1	Slc6a19
L-Serine	cpd:C00065	Mouse small intestine	6.30811	1	Slc6a19
L-Glutamine	cpd:C00064	Mouse small intestine	6.30811	1	Slc6a19
L-Phenylalanine	cpd:C00079	Mouse small intestine	6.30811	1	Slc6a19
L-Cysteine	cpd:C00097	Mouse small intestine	6.30811	1	Slc6a19
Butanoic acid	cpd:C00246	Mouse kidney	6.24994	1	Slc5a12
Nicotinate	cpd:C00253	Mouse kidney	6.24994	1	Slc5a12
(S)-Lactate	cpd:C00186	Mouse kidney	6.24994	1	Slc5a12
Pyruvate	cpd:C00022	Mouse kidney	6.22345	1	Slc5a8
Propanoate	cpd:C00163	Mouse kidney	6.22345	1	Slc5a8
Acetate	cpd:C00033	Mouse kidney	6.22345	1	Slc5a8
L-Pipecolate	cpd:C00408	Mouse kidney	6.17676	1	Slc6a20b
L-Proline	cpd:C00148	Mouse kidney	6.17676	1	Slc6a20b
Prostaglandin F2alpha	cpd:C00639	Mouse liver	6.09111	1	Slc22a1
Dopamine	cpd:C03758	Mouse liver	6.09111	1	Slc22a1
Prostaglandin E2	cpd:C00584	Mouse liver	6.09111	1	Slc22a1
Serotonin	cpd:C00780	Mouse liver	6.09111	1	Slc22a1
Estradiol-17beta	cpd:C00951	Mouse liver	6.09111	1	Slc22a1
4-Aminobutanoate	cpd:C00334	Mouse brain	5.99505	1	Slc6a1
alpha-D-Glucose	cpd:C00267	Mouse testis	5.90384	1	Slc2a3
D-Mannose	cpd:C00159	Mouse testis	5.90384	1	Slc2a3
D-Glucose	cpd:C00031	Mouse testis	5.90384	1	Slc2a3
L-Alanine	cpd:C00041	Mouse kidney	5.85177	1	Slc6a18
L-Serine	cpd:C00065	Mouse kidney	5.85177	1	Slc6a18
L-Isoleucine	cpd:C00407	Mouse kidney	5.85177	1	Slc6a18
L-Leucine	cpd:C00123	Mouse kidney	5.85177	1	Slc6a18
Glycine	cpd:C00037	Mouse kidney	5.85177	1	Slc6a18
L-Valine	cpd:C00183	Mouse kidney	5.85177	1	Slc6a18
alpha-D-Glucose	cpd:C00267	Mouse muscle	5.71853	1	Slc2a4
D-Glucosamine	cpd:C00329	Mouse muscle	5.71853	1	Slc2a4
D-Glucose	cpd:C00031	Mouse muscle	5.71853	1	Slc2a4
beta-D-Fructose	cpd:C02336	Mouse testis	5.67235	1	Slc2a5
D-Fructose	cpd:C00095	Mouse testis	5.67235	1	Slc2a5
Succinate	cpd:C00042	Mouse small intestine	5.64607	1	Slc13a2
Fumarate	cpd:C00122	Mouse small intestine	5.64607	1	Slc13a2
2-Oxoglutarate	cpd:C00026	Mouse small intestine	5.64607	1	Slc13a2
Citrate	cpd:C00158	Mouse small intestine	5.64607	1	Slc13a2
Prostaglandin H2	cpd:C00427	Mouse placenta	5.61789	1	Slco2a1
Prostaglandin E2	cpd:C00584	Mouse placenta	5.61789	1	Slco2a1
D-Aspartate	cpd:C00402	Mouse kidney	5.57476	1	Slc1a1
4-Aminobutanoate	cpd:C00334	Mouse liver	5.52952	1	Slc6a13
L-Glutamine	cpd:C00064	Mouse kidney	5.52646	1	Slc6a19
L-Phenylalanine	cpd:C00079	Mouse kidney	5.52646	1	Slc6a19
L-Cysteine	cpd:C00097	Mouse kidney	5.52646	1	Slc6a19
alpha-D-Glucose	cpd:C00267	Mouse placenta	5.47703	1	Slc2a1
D-Glucosamine	cpd:C00329	Mouse placenta	5.47703	1	Slc2a1
D-Mannose	cpd:C00159	Mouse placenta	5.47703	1	Slc2a1
D-Galactose	cpd:C00124	Mouse placenta	5.47703	1	Slc2a1
D-Glucose	cpd:C00031	Mouse placenta	5.47703	1	Slc2a1
2-Oxoglutarate	cpd:C00026	Mouse kidney	5.40182	1	Slc13a3
Citrate	cpd:C00158	Mouse kidney	5.40182	1	Slc13a3
N-Acetyl-L-aspartate	cpd:C01042	Mouse kidney	5.40182	1	Slc13a3
4-Aminobutanoate	cpd:C00334	Mouse eye	5.38968	1	Slc6a1
Adenosine	cpd:C00212	Mouse small intestine	5.35687	1	Slc28a2
Inosine	cpd:C00294	Mouse small intestine	5.35687	1	Slc28a2
Guanosine	cpd:C00387	Mouse small intestine	5.35687	1	Slc28a2
Uridine	cpd:C00299	Mouse small intestine	5.35687	1	Slc28a2
alpha-D-Glucose	cpd:C00267	Mouse heart	5.13371	1	Slc2a4
D-Glucosamine	cpd:C00329	Mouse heart	5.13371	1	Slc2a4
D-Glucose	cpd:C00031	Mouse heart	5.13371	1	Slc2a4
Prostaglandin H2	cpd:C00427	Mouse lung	5.09448	1	Slco2a1
Prostaglandin E2	cpd:C00584	Mouse lung	5.09448	1	Slco2a1
L-Histidine	cpd:C00135	Mouse small intestine	4.98057	1	Slc7a7
3,4-Dihydroxy-L-phenylalanine	cpd:C00355	Mouse small intestine	4.98057	1	Slc7a7
L-Histidine	cpd:C00135	Mouse kidney	4.77883	1	Slc7a7
3,4-Dihydroxy-L-phenylalanine	cpd:C00355	Mouse kidney	4.77883	1	Slc7a7
L-Aspartate	cpd:C00049	Mouse brain	4.77624	1	Slc1a3
L-Glutamate	cpd:C00025	Mouse brain	4.77624	1	Slc1a3
L-Alanine	cpd:C00041	Mouse muscle	4.75175	1	Slc38a4
L-Histidine	cpd:C00135	Mouse muscle	4.75175	1	Slc38a4
L-Glutamine	cpd:C00064	Mouse muscle	4.75175	1	Slc38a4
L-Cysteine	cpd:C00097	Mouse muscle	4.75175	1	Slc38a4
Glycine	cpd:C00037	Mouse muscle	4.75175	1	Slc38a4
L-Isoleucine	cpd:C00407	Mouse brain	4.74154	1	Slc6a15
L-Leucine	cpd:C00123	Mouse brain	4.74154	1	Slc6a15
L-Valine	cpd:C00183	Mouse brain	4.74154	1	Slc6a15
3',5'-Cyclic GMP	cpd:C00942	Mouse kidney	4.66841	1	Slc22a8
Cortisol	cpd:C00735	Mouse kidney	4.66841	1	Slc22a8
3',5'-Cyclic AMP	cpd:C00575	Mouse kidney	4.66841	1	Slc22a8
Linoleate	cpd:C01595	Mouse adrenal gland	4.55421	1	Slc27a3
Tetradecanoic acid	cpd:C06424	Mouse adrenal gland	4.55421	1	Slc27a3
Hexadecanoic acid	cpd:C00249	Mouse adrenal gland	4.55421	1	Slc27a3
Arachidonate	cpd:C00219	Mouse adrenal gland	4.55421	1	Slc27a3
L-Alanine	cpd:C00041	Mouse adipose tissue	4.46903	1	Slc7a10
L-Serine	cpd:C00065	Mouse adipose tissue	4.46903	1	Slc7a10
L-Cysteine	cpd:C00097	Mouse adipose tissue	4.46903	1	Slc7a10
Glycine	cpd:C00037	Mouse adipose tissue	4.46903	1	Slc7a10
Pyruvate	cpd:C00022	Mouse salivary gland	4.44582	1	Slc5a8
Propanoate	cpd:C00163	Mouse salivary gland	4.44582	1	Slc5a8
Acetate	cpd:C00033	Mouse salivary gland	4.44582	1	Slc5a8
Nicotinate	cpd:C00253	Mouse salivary gland	4.44582	1	Slc5a8
(S)-Lactate	cpd:C00186	Mouse salivary gland	4.44582	1	Slc5a8
Urea	cpd:C00086	Mouse bone marrow	4.38258	1	Slc14a1
Estrone 3-sulfate	cpd:C02538	Mouse placenta	4.36217	1	Slco4a1
Butanoic acid	cpd:C00246	Mouse small intestine	4.3262	1	Slc5a12
Nicotinate	cpd:C00253	Mouse small intestine	4.3262	1	Slc5a12
(S)-Lactate	cpd:C00186	Mouse small intestine	4.3262	1	Slc5a12
Folate	cpd:C00504	Mouse small intestine	4.29865	1	Slc46a1
L-Isoleucine	cpd:C00407	Mouse bone marrow	4.23553	1	Slc43a1
L-Methionine	cpd:C00073	Mouse bone marrow	4.23553	1	Slc43a1
L-Phenylalanine	cpd:C00079	Mouse bone marrow	4.23553	1	Slc43a1
Prostaglandin E2	cpd:C00584	Mouse eye	4.22147	1	Slco4a1
L-Proline	cpd:C00148	Mouse adipose tissue	4.19857	1	Slc36a2
Pyruvate	cpd:C00022	Mouse muscle	4.19749	1	Slc16a3
Acetoacetate	cpd:C00164	Mouse muscle	4.19749	1	Slc16a3
(R)-3-Hydroxybutanoate	cpd:C01089	Mouse muscle	4.19749	1	Slc16a3
(S)-Lactate	cpd:C00186	Mouse muscle	4.19749	1	Slc16a3
Cortisol	cpd:C00735	Mouse liver	4.18537	1	Slco1a1
Aldosterone	cpd:C01780	Mouse liver	4.18537	1	Slco1a1
L-Glutamine	cpd:C00064	Mouse adipose tissue	4.17787	1	Slc1a5
Linoleate	cpd:C01595	Mouse salivary gland	4.11129	1	Slc27a2
Arachidonate	cpd:C00219	Mouse salivary gland	4.11129	1	Slc27a2
L-Histidine	cpd:C00135	Mouse lung	4.06582	1	Slc6a14
L-Serine	cpd:C00065	Mouse lung	4.06582	1	Slc6a14
beta-Alanine	cpd:C00099	Mouse lung	4.06582	1	Slc6a14
L-Arginine	cpd:C00062	Mouse lung	4.06582	1	Slc6a14
L-Glutamine	cpd:C00064	Mouse lung	4.06582	1	Slc6a14
L-Methionine	cpd:C00073	Mouse lung	4.06582	1	Slc6a14
L-Cysteine	cpd:C00097	Mouse lung	4.06582	1	Slc6a14
4-Aminobutanoate	cpd:C00334	Mouse placenta	4.00625	1	Slc6a12
Linoleate	cpd:C01595	Mouse small intestine	3.98129	1	Slc27a2
Hexadecanoic acid	cpd:C00249	Mouse small intestine	3.98129	1	Slc27a2
Arachidonate	cpd:C00219	Mouse small intestine	3.98129	1	Slc27a2
4-Aminobutanoate	cpd:C00334	Mouse kidney	3.95268	1	Slc6a13
Urea	cpd:C00086	Mouse ovary	3.92108	1	Slc14a1
Dimethylallyl diphosphate	cpd:C00235	Mouse kidney	3.89402	1	Slc22a13
L-Histidine	cpd:C00135	Mouse ovary	3.87783	1	Slc38a5
L-Serine	cpd:C00065	Mouse ovary	3.87783	1	Slc38a5
L-Glutamine	cpd:C00064	Mouse ovary	3.87783	1	Slc38a5
Glycine	cpd:C00037	Mouse ovary	3.87783	1	Slc38a5
L-Noradrenaline	cpd:C00547	Mouse placenta	3.83004	1	Slc6a2
Dopamine	cpd:C03758	Mouse placenta	3.83004	1	Slc6a2
L-Histidine	cpd:C00135	Mouse bone marrow	3.81005	1	Slc38a5
L-Glutamine	cpd:C00064	Mouse bone marrow	3.81005	1	Slc38a5
L-Asparagine	cpd:C00152	Mouse bone marrow	3.81005	1	Slc38a5
Glycine	cpd:C00037	Mouse bone marrow	3.81005	1	Slc38a5
L-Aspartate	cpd:C00049	Mouse adipose tissue	3.73981	1	Slc1a3
L-Glutamate	cpd:C00025	Mouse adipose tissue	3.73981	1	Slc1a3
Pyruvate	cpd:C00022	Mouse testis	3.73038	1	Slc16a7
Acetoacetate	cpd:C00164	Mouse testis	3.73038	1	Slc16a7
(S)-Lactate	cpd:C00186	Mouse testis	3.73038	1	Slc16a7
Prostaglandin H2	cpd:C00427	Mouse kidney	3.72434	1	Slc22a6
L-Isoleucine	cpd:C00407	Mouse salivary gland	3.72161	1	Slc7a5
L-Leucine	cpd:C00123	Mouse salivary gland	3.72161	1	Slc7a5
L-Valine	cpd:C00183	Mouse salivary gland	3.72161	1	Slc7a5
Serotonin	cpd:C00780	Mouse small intestine	3.69756	1	Slc6a4
L-Histidine	cpd:C00135	Mouse adipose tissue	3.68929	1	Slc38a5
L-Asparagine	cpd:C00152	Mouse adipose tissue	3.68929	1	Slc38a5
alpha-D-Glucose	cpd:C00267	Mouse adipose tissue	3.63382	1	Slc2a4
D-Glucosamine	cpd:C00329	Mouse adipose tissue	3.63382	1	Slc2a4
L-Alanine	cpd:C00041	Mouse adrenal gland	3.62991	1	Slc36a2
L-Proline	cpd:C00148	Mouse adrenal gland	3.62991	1	Slc36a2
Glycine	cpd:C00037	Mouse adrenal gland	3.62991	1	Slc36a2
Aldosterone	cpd:C01780	Mouse kidney	3.57564	1	Slco1a1
Estradiol-17beta 3-glucuronide	cpd:C05503	Mouse kidney	3.57564	1	Slco1a1
L-Tryptophan	cpd:C00078	Mouse small intestine	3.5488	1	Slc7a15
L-Tyrosine	cpd:C00082	Mouse small intestine	3.5488	1	Slc7a15
Adenosine	cpd:C00212	Mouse spleen	3.50379	1	Slc28a2
Inosine	cpd:C00294	Mouse spleen	3.50379	1	Slc28a2
Guanosine	cpd:C00387	Mouse spleen	3.50379	1	Slc28a2
Uridine	cpd:C00299	Mouse spleen	3.50379	1	Slc28a2
L-Isoleucine	cpd:C00407	Mouse eye	3.49592	1	Slc6a15
L-Leucine	cpd:C00123	Mouse eye	3.49592	1	Slc6a15
L-Valine	cpd:C00183	Mouse eye	3.49592	1	Slc6a15
alpha-D-Glucose	cpd:C00267	Mouse salivary gland	3.48221	1	Slc2a5
beta-D-Fructose	cpd:C02336	Mouse salivary gland	3.48221	1	Slc2a5
D-Fructose	cpd:C00095	Mouse salivary gland	3.48221	1	Slc2a5
Thiamine	cpd:C00378	Mouse liver	3.47664	1	Slc19a2
Biotin	cpd:C00120	Mouse placenta	3.42002	1	Slc5a6
Pantothenate	cpd:C00864	Mouse placenta	3.42002	1	Slc5a6
Creatine	cpd:C00300	Mouse small intestine	3.40657	1	Slc6a8
L-Glutamine	cpd:C00064	Mouse brain	3.36284	1	Slc1a6
Pyruvate	cpd:C00022	Mouse placenta	3.34961	1	Slc16a3
(S)-Lactate	cpd:C00186	Mouse placenta	3.34961	1	Slc16a3
L-Tryptophan	cpd:C00078	Mouse placenta	3.2518	1	Slc7a5
L-Isoleucine	cpd:C00407	Mouse placenta	3.2518	1	Slc7a5
L-Leucine	cpd:C00123	Mouse placenta	3.2518	1	Slc7a5
L-Valine	cpd:C00183	Mouse placenta	3.2518	1	Slc7a5
Ascorbate	cpd:C00072	Mouse liver	3.22687	1	Slc23a1
myo-Inositol	cpd:C00137	Mouse small intestine	3.19455	1	Slc5a11
Histamine	cpd:C00388	Mouse placenta	3.17639	1	Slc22a3
Corticosterone	cpd:C02140	Mouse placenta	3.17639	1	Slc22a3
Estradiol-17beta	cpd:C00951	Mouse placenta	3.17639	1	Slc22a3
alpha-D-Glucose	cpd:C00267	Mouse bone marrow	3.16199	1	Slc2a3
D-Mannose	cpd:C00159	Mouse bone marrow	3.16199	1	Slc2a3
D-Glucose	cpd:C00031	Mouse bone marrow	3.16199	1	Slc2a3
Prostaglandin F2alpha	cpd:C00639	Mouse small intestine	3.14436	1	Slc22a1
Dopamine	cpd:C03758	Mouse small intestine	3.14436	1	Slc22a1
Prostaglandin E2	cpd:C00584	Mouse small intestine	3.14436	1	Slc22a1
Estradiol-17beta	cpd:C00951	Mouse small intestine	3.14436	1	Slc22a1
Betaine	cpd:C00719	Mouse liver	3.13119	1	Slc6a12
L-Noradrenaline	cpd:C00547	Mouse adipose tissue	3.1246	1	Slc22a3
Dopamine	cpd:C03758	Mouse adipose tissue	3.1246	1	Slc22a3
Histamine	cpd:C00388	Mouse adipose tissue	3.1246	1	Slc22a3
Corticosterone	cpd:C02140	Mouse adipose tissue	3.1246	1	Slc22a3
Estradiol-17beta	cpd:C00951	Mouse adipose tissue	3.1246	1	Slc22a3
L-Glutamate	cpd:C00025	Mouse eye	3.09553	1	Slc1a7
alpha-D-Glucose	cpd:C00267	Mouse brain	3.02956	1	Slc2a3
D-Mannose	cpd:C00159	Mouse brain	3.02956	1	Slc2a3
D-Galactose	cpd:C00124	Mouse brain	3.02956	1	Slc2a3
D-Glucose	cpd:C00031	Mouse brain	3.02956	1	Slc2a3
Linoleate	cpd:C01595	Mouse adipose tissue	3.0145	1	Slc27a1
Tetradecanoic acid	cpd:C06424	Mouse adipose tissue	3.0145	1	Slc27a1
(9Z)-Octadecenoic acid	cpd:C00712	Mouse adipose tissue	3.0145	1	Slc27a1
Hexadecanoic acid	cpd:C00249	Mouse adipose tissue	3.0145	1	Slc27a1
Dodecanoic acid	cpd:C02679	Mouse adipose tissue	3.0145	1	Slc27a1
Octadecanoic acid	cpd:C01530	Mouse adipose tissue	3.0145	1	Slc27a1
Arachidonate	cpd:C00219	Mouse adipose tissue	3.0145	1	Slc27a1
Succinate	cpd:C00042	Mouse liver	2.98113	1	Slc22a7
myo-Inositol	cpd:C00137	Mouse kidney	2.9222	1	Slc5a11
Glycine	cpd:C00037	Mouse lung	2.87074	1	Slc38a5
Fumarate	cpd:C00122	Mouse kidney	2.85725	1	Slc13a2
alpha-D-Glucose	cpd:C00267	Mouse eye	2.83166	1	Slc2a1
D-Glucosamine	cpd:C00329	Mouse eye	2.83166	1	Slc2a1
D-Mannose	cpd:C00159	Mouse eye	2.83166	1	Slc2a1
D-Galactose	cpd:C00124	Mouse eye	2.83166	1	Slc2a1
D-Glucose	cpd:C00031	Mouse eye	2.83166	1	Slc2a1
L-Ornithine	cpd:C00077	Mouse placenta	2.79985	1	Slc7a9
Adenosine	cpd:C00212	Mouse bone marrow	2.7914	1	Slc28a2
Inosine	cpd:C00294	Mouse bone marrow	2.7914	1	Slc28a2
Guanosine	cpd:C00387	Mouse bone marrow	2.7914	1	Slc28a2
Uridine	cpd:C00299	Mouse bone marrow	2.7914	1	Slc28a2
Prostaglandin H2	cpd:C00427	Mouse small intestine	2.74895	1	Slco2a1
Pyruvate	cpd:C00022	Mouse small intestine	2.71547	1	Slc5a8
Propanoate	cpd:C00163	Mouse small intestine	2.71547	1	Slc5a8
Acetate	cpd:C00033	Mouse small intestine	2.71547	1	Slc5a8
L-Serine	cpd:C00065	Mouse brain	2.64815	1	Slc6a17
L-Cysteine	cpd:C00097	Mouse brain	2.64815	1	Slc6a17
L-Histidine	cpd:C00135	Mouse testis	2.63689	1	Slc7a5
L-Tryptophan	cpd:C00078	Mouse testis	2.63689	1	Slc7a5
L-Isoleucine	cpd:C00407	Mouse testis	2.63689	1	Slc7a5
L-Methionine	cpd:C00073	Mouse testis	2.63689	1	Slc7a5
L-Phenylalanine	cpd:C00079	Mouse testis	2.63689	1	Slc7a5
L-Tyrosine	cpd:C00082	Mouse testis	2.63689	1	Slc7a5
L-Valine	cpd:C00183	Mouse testis	2.63689	1	Slc7a5
myo-Inositol	cpd:C00137	Mouse brain	2.59793	1	Slc2a13
1D-myo-Inositol 3-phosphate	cpd:C04006	Mouse brain	2.59793	1	Slc2a13
Prostaglandin E2	cpd:C00584	Mouse brain	2.58462	1	Slco1a4
Aldosterone	cpd:C01780	Mouse brain	2.58462	1	Slco1a4
Ascorbate	cpd:C00072	Mouse adrenal gland	2.55058	1	Slc23a2
Folate	cpd:C00504	Mouse liver	2.49493	1	Slc46a1
Serotonin	cpd:C00780	Mouse adrenal gland	2.47624	1	Slc6a4
beta-Alanine	cpd:C00099	Mouse small intestine	2.46855	1	Slc36a1
L-Proline	cpd:C00148	Mouse small intestine	2.46855	1	Slc36a1
Glycine	cpd:C00037	Mouse small intestine	2.46855	1	Slc36a1
4-Aminobutanoate	cpd:C00334	Mouse small intestine	2.46855	1	Slc36a1
Adenosine	cpd:C00212	Mouse adipose tissue	2.42447	1	Slc28a2
Inosine	cpd:C00294	Mouse adipose tissue	2.42447	1	Slc28a2
Guanosine	cpd:C00387	Mouse adipose tissue	2.42447	1	Slc28a2
Uridine	cpd:C00299	Mouse adipose tissue	2.42447	1	Slc28a2
L-Glutamate	cpd:C00025	Mouse small intestine	2.41451	1	Slc1a1
Folate	cpd:C00504	Mouse kidney	2.38795	1	Slc46a1
Aldosterone	cpd:C01780	Mouse eye	2.38403	1	Slco1a4
Adenosine	cpd:C00212	Mouse heart	2.36099	1	Slc28a2
Inosine	cpd:C00294	Mouse heart	2.36099	1	Slc28a2
Guanosine	cpd:C00387	Mouse heart	2.36099	1	Slc28a2
Uridine	cpd:C00299	Mouse heart	2.36099	1	Slc28a2
Urea	cpd:C00086	Mouse kidney	2.31502	1	Slc14a2
Acetoacetate	cpd:C00164	Mouse kidney	2.31328	1	Slc16a7
(R)-3-Hydroxybutanoate	cpd:C01089	Mouse kidney	2.31328	1	Slc16a7
L-Isoleucine	cpd:C00407	Mouse adipose tissue	2.26028	1	Slc43a1
L-Methionine	cpd:C00073	Mouse adipose tissue	2.26028	1	Slc43a1
L-Leucine	cpd:C00123	Mouse adipose tissue	2.26028	1	Slc43a1
L-Phenylalanine	cpd:C00079	Mouse adipose tissue	2.26028	1	Slc43a1
L-Threonine	cpd:C00188	Mouse small intestine	2.25691	1	Slc7a8
L-Tryptophan	cpd:C00078	Mouse kidney	2.22393	1	Slc7a8
L-Threonine	cpd:C00188	Mouse kidney	2.22393	1	Slc7a8
L-Tyrosine	cpd:C00082	Mouse kidney	2.22393	1	Slc7a8
L-Noradrenaline	cpd:C00547	Mouse lung	2.21912	1	Slc6a2
Dopamine	cpd:C03758	Mouse lung	2.21912	1	Slc6a2
Prostaglandin H2	cpd:C00427	Mouse ovary	2.21885	1	Slco2a1
Prostaglandin E2	cpd:C00584	Mouse ovary	2.21885	1	Slco2a1
L-Serine	cpd:C00065	Mouse salivary gland	2.19888	1	Slc6a14
beta-Alanine	cpd:C00099	Mouse salivary gland	2.19888	1	Slc6a14
L-Arginine	cpd:C00062	Mouse salivary gland	2.19888	1	Slc6a14
L-Glutamine	cpd:C00064	Mouse salivary gland	2.19888	1	Slc6a14
L-Cysteine	cpd:C00097	Mouse salivary gland	2.19888	1	Slc6a14
L-Asparagine	cpd:C00152	Mouse salivary gland	2.19888	1	Slc6a14
L-Threonine	cpd:C00188	Mouse salivary gland	2.19888	1	Slc6a14
L-Proline	cpd:C00148	Mouse salivary gland	2.19888	1	Slc6a14
Chenodeoxycholate	cpd:C02528	Mouse kidney	2.17331	1	Slc10a2
Cholic acid	cpd:C00695	Mouse kidney	2.17331	1	Slc10a2
Creatine	cpd:C00300	Mouse kidney	2.15545	1	Slc6a8
Glycochenodeoxycholate	cpd:C05466	Mouse liver	2.13799	1	Slc10a2
Chenodeoxycholate	cpd:C02528	Mouse liver	2.13799	1	Slc10a2
Succinate	cpd:C00042	Mouse testis	2.13372	1	Slc13a5
Citrate	cpd:C00158	Mouse testis	2.13372	1	Slc13a5
Prostaglandin E2	cpd:C00584	Mouse heart	2.11634	1	Slco3a1
alpha-D-Glucose	cpd:C00267	Mouse adrenal gland	2.08571	1	Slc2a4
D-Glucosamine	cpd:C00329	Mouse adrenal gland	2.08571	1	Slc2a4
D-Glucose	cpd:C00031	Mouse adrenal gland	2.08571	1	Slc2a4
Ascorbate	cpd:C00072	Mouse lung	2.07663	1	Slc23a2
beta-Alanine	cpd:C00099	Mouse kidney	2.03256	1	Slc36a1
L-Serine	cpd:C00065	Mouse testis	2.03063	1	Slc38a5
L-Glutamine	cpd:C00064	Mouse testis	2.03063	1	Slc38a5
L-Asparagine	cpd:C00152	Mouse testis	2.03063	1	Slc38a5
Glycine	cpd:C00037	Mouse testis	2.03063	1	Slc38a5
L-Histidine	cpd:C00135	Mouse adrenal gland	1.99857	1	Slc7a5
L-Tryptophan	cpd:C00078	Mouse adrenal gland	1.99857	1	Slc7a5
L-Isoleucine	cpd:C00407	Mouse adrenal gland	1.99857	1	Slc7a5
L-Methionine	cpd:C00073	Mouse adrenal gland	1.99857	1	Slc7a5
L-Leucine	cpd:C00123	Mouse adrenal gland	1.99857	1	Slc7a5
L-Phenylalanine	cpd:C00079	Mouse adrenal gland	1.99857	1	Slc7a5
3,4-Dihydroxy-L-phenylalanine	cpd:C00355	Mouse adrenal gland	1.99857	1	Slc7a5
L-Tyrosine	cpd:C00082	Mouse adrenal gland	1.99857	1	Slc7a5
L-Valine	cpd:C00183	Mouse adrenal gland	1.99857	1	Slc7a5
Adenosine	cpd:C00212	Mouse kidney	1.99244	1	Slc29a3
Adenine	cpd:C00147	Mouse kidney	1.99244	1	Slc29a3
Inosine	cpd:C00294	Mouse kidney	1.99244	1	Slc29a3
Guanosine	cpd:C00387	Mouse kidney	1.99244	1	Slc29a3
Cytidine	cpd:C00475	Mouse kidney	1.99244	1	Slc29a3
Thymidine	cpd:C00214	Mouse kidney	1.99244	1	Slc29a3
Uridine	cpd:C00299	Mouse kidney	1.99244	1	Slc29a3
Chenodeoxycholate	cpd:C02528	Mouse small intestine	1.97661	1	Slc10a2
Cholic acid	cpd:C00695	Mouse small intestine	1.97661	1	Slc10a2
L-Isoleucine	cpd:C00407	Mouse ovary	1.96534	1	Slc7a5
L-Methionine	cpd:C00073	Mouse ovary	1.96534	1	Slc7a5
L-Leucine	cpd:C00123	Mouse ovary	1.96534	1	Slc7a5
L-Valine	cpd:C00183	Mouse ovary	1.96534	1	Slc7a5
L-Alanine	cpd:C00041	Mouse lung	1.9555	1	Slc36a2
L-Alanine	cpd:C00041	Mouse ovary	1.95155	1	Slc1a5
L-Cysteine	cpd:C00097	Mouse ovary	1.95155	1	Slc1a5
L-Histidine	cpd:C00135	Mouse eye	1.95143	1	Slc38a3
beta-Alanine	cpd:C00099	Mouse brain	1.93779	1	Slc36a1
Glycine	cpd:C00037	Mouse brain	1.93779	1	Slc36a1
alpha-D-Glucose	cpd:C00267	Mouse ovary	1.937	1	Slc2a4
Pyruvate	cpd:C00022	Mouse liver	1.93047	1	Slc16a7
Acetoacetate	cpd:C00164	Mouse liver	1.93047	1	Slc16a7
(R)-3-Hydroxybutanoate	cpd:C01089	Mouse liver	1.93047	1	Slc16a7
L-Aspartate	cpd:C00049	Mouse ovary	1.93044	1	Slc1a3
L-Glutamate	cpd:C00025	Mouse ovary	1.93044	1	Slc1a3
Pantothenate	cpd:C00864	Mouse adipose tissue	1.90387	1	Slc5a6
L-Histidine	cpd:C00135	Mouse spleen	1.88815	1	Slc15a3
Adenosine	cpd:C00212	Mouse muscle	1.883	1	Slc28a2
Inosine	cpd:C00294	Mouse muscle	1.883	1	Slc28a2
Guanosine	cpd:C00387	Mouse muscle	1.883	1	Slc28a2
Uridine	cpd:C00299	Mouse muscle	1.883	1	Slc28a2
D-Serine	cpd:C00740	Mouse brain	1.85795	1	Slc7a10
D-Xylose	cpd:C00181	Mouse ovary	1.84521	1	Slc2a3
D-Galactose	cpd:C00124	Mouse ovary	1.84521	1	Slc2a3
myo-Inositol	cpd:C00137	Mouse eye	1.83471	1	Slc2a13
1D-myo-Inositol 3-phosphate	cpd:C04006	Mouse eye	1.83471	1	Slc2a13
L-Ornithine	cpd:C00077	Mouse adipose tissue	1.82493	1	Slc7a9
L-Arginine	cpd:C00062	Mouse adipose tissue	1.82493	1	Slc7a9
N-Carbamoyl-L-aspartate	cpd:C00438	Mouse adipose tissue	1.79082	1	Slc1a1
Glycine	cpd:C00037	Mouse eye	1.76316	1	Slc6a9
Creatine	cpd:C00300	Mouse placenta	1.73787	1	Slc6a8
Thiamine	cpd:C00378	Mouse kidney	1.72163	1	Slc19a3
4-Aminobutanoate	cpd:C00334	Mouse adipose tissue	1.72107	1	Slc6a13
L-Glutamine	cpd:C00064	Mouse pituitary gland	1.71634	1	Slc6a17
L-Methionine	cpd:C00073	Mouse pituitary gland	1.71634	1	Slc6a17
L-Leucine	cpd:C00123	Mouse pituitary gland	1.71634	1	Slc6a17
L-Proline	cpd:C00148	Mouse pituitary gland	1.71634	1	Slc6a17
L-Proline	cpd:C00148	Mouse ovary	1.70614	1	Slc36a2
D-Aspartate	cpd:C00402	Mouse liver	1.68288	1	Slc1a2
L-Aspartate	cpd:C00049	Mouse liver	1.68288	1	Slc1a2
L-Glutamate	cpd:C00025	Mouse liver	1.68288	1	Slc1a2
Adenosine	cpd:C00212	Mouse adrenal gland	1.67866	1	Slc29a4
Taurine	cpd:C00245	Mouse adrenal gland	1.66696	1	Slc6a6
L-Histidine	cpd:C00135	Mouse brain	1.63781	1	Slc7a3
L-Arginine	cpd:C00062	Mouse brain	1.63781	1	Slc7a3
L-Alanine	cpd:C00041	Mouse bone marrow	1.63674	1	Slc1a5
L-Cysteine	cpd:C00097	Mouse bone marrow	1.63674	1	Slc1a5
L-Alanine	cpd:C00041	Mouse heart	1.6227	1	Slc36a2
L-Proline	cpd:C00148	Mouse heart	1.6227	1	Slc36a2
Glycine	cpd:C00037	Mouse heart	1.6227	1	Slc36a2
D-Xylose	cpd:C00181	Mouse eye	1.59805	1	Slc2a3
D-Glucosamine	cpd:C00329	Mouse brain	1.5876	1	Slc2a1
Deoxycytidine	cpd:C00881	Mouse liver	1.57696	1	Slc29a1
Adenosine	cpd:C00212	Mouse liver	1.57696	1	Slc29a1
Inosine	cpd:C00294	Mouse liver	1.57696	1	Slc29a1
Deoxyguanosine	cpd:C00330	Mouse liver	1.57696	1	Slc29a1
Guanosine	cpd:C00387	Mouse liver	1.57696	1	Slc29a1
Cytidine	cpd:C00475	Mouse liver	1.57696	1	Slc29a1
Thymidine	cpd:C00214	Mouse liver	1.57696	1	Slc29a1
Deoxyadenosine	cpd:C00559	Mouse liver	1.57696	1	Slc29a1
Uridine	cpd:C00299	Mouse liver	1.57696	1	Slc29a1
Prostaglandin H2	cpd:C00427	Mouse adipose tissue	1.56673	1	Slco2a1
Prostaglandin E2	cpd:C00584	Mouse adipose tissue	1.56673	1	Slco2a1
D-Mannose	cpd:C00159	Mouse salivary gland	1.56611	1	Slc5a9
L-Tryptophan	cpd:C00078	Mouse bone marrow	1.55414	1	Slc7a5
L-Tyrosine	cpd:C00082	Mouse bone marrow	1.55414	1	Slc7a5
L-Valine	cpd:C00183	Mouse bone marrow	1.55414	1	Slc7a5
L-Arginine	cpd:C00062	Mouse eye	1.51334	1	Slc6a14
Pyruvate	cpd:C00022	Mouse bone marrow	1.50927	1	Slc16a3
(S)-Lactate	cpd:C00186	Mouse bone marrow	1.50927	1	Slc16a3
Dehydroepiandrosterone sulfate	cpd:C04555	Mouse liver	1.50891	1	Slco2b1
Linoleate	cpd:C01595	Mouse ovary	1.47647	1	Slc27a1
Tetradecanoic acid	cpd:C06424	Mouse ovary	1.47647	1	Slc27a1
(9Z)-Octadecenoic acid	cpd:C00712	Mouse ovary	1.47647	1	Slc27a1
Hexadecanoic acid	cpd:C00249	Mouse ovary	1.47647	1	Slc27a1
Icosanoic acid	cpd:C06425	Mouse ovary	1.47647	1	Slc27a1
(5Z,8Z,11Z,14Z,17Z)-Icosapentaenoic acid	cpd:C06428	Mouse ovary	1.47647	1	Slc27a1
Octadecanoic acid	cpd:C01530	Mouse ovary	1.47647	1	Slc27a1
Arachidonate	cpd:C00219	Mouse ovary	1.47647	1	Slc27a1
L-Alanine	cpd:C00041	Mouse salivary gland	1.46619	1	Slc1a5
Prostaglandin H2	cpd:C00427	Mouse spleen	1.43184	1	Slco2a1
L-Glutamate	cpd:C00025	Mouse placenta	1.43175	1	Slc1a1
beta-D-Fructose	cpd:C02336	Mouse placenta	1.40925	1	Slc2a2
D-Fructose	cpd:C00095	Mouse placenta	1.40925	1	Slc2a2
Adenine	cpd:C00147	Mouse adipose tissue	1.40792	1	Slc29a3
Cytidine	cpd:C00475	Mouse adipose tissue	1.40792	1	Slc29a3
Thymidine	cpd:C00214	Mouse adipose tissue	1.40792	1	Slc29a3
L-Isoleucine	cpd:C00407	Mouse muscle	1.37903	1	Slc43a1
L-Leucine	cpd:C00123	Mouse muscle	1.37903	1	Slc43a1
L-Phenylalanine	cpd:C00079	Mouse muscle	1.37903	1	Slc43a1
L-Serine	cpd:C00065	Mouse adrenal gland	1.36388	1	Slc1a5
L-Glutamine	cpd:C00064	Mouse adrenal gland	1.36388	1	Slc1a5
L-Cysteine	cpd:C00097	Mouse adrenal gland	1.36388	1	Slc1a5
L-Threonine	cpd:C00188	Mouse adrenal gland	1.36388	1	Slc1a5
2-Oxoglutarate	cpd:C00026	Mouse liver	1.34348	1	Slc13a3
Citrate	cpd:C00158	Mouse liver	1.34348	1	Slc13a3
N-Acetyl-L-aspartate	cpd:C01042	Mouse liver	1.34348	1	Slc13a3
L-Tryptophan	cpd:C00078	Mouse liver	1.27481	1	Slc16a10
L-Phenylalanine	cpd:C00079	Mouse liver	1.27481	1	Slc16a10
L-Tyrosine	cpd:C00082	Mouse liver	1.27481	1	Slc16a10
Pyruvate	cpd:C00022	Mouse heart	1.26093	1	Slc16a1
Acetoacetate	cpd:C00164	Mouse heart	1.26093	1	Slc16a1
(R)-3-Hydroxybutanoate	cpd:C01089	Mouse heart	1.26093	1	Slc16a1
(S)-Lactate	cpd:C00186	Mouse heart	1.26093	1	Slc16a1
L-Asparagine	cpd:C00152	Mouse brain	1.22715	1	Slc38a1
Succinate	cpd:C00042	Mouse brain	1.18234	1	Slc13a3
2-Oxoglutarate	cpd:C00026	Mouse brain	1.18234	1	Slc13a3
Citrate	cpd:C00158	Mouse brain	1.18234	1	Slc13a3
N-Acetyl-L-aspartate	cpd:C01042	Mouse brain	1.18234	1	Slc13a3
D-Aspartate	cpd:C00402	Mouse salivary gland	1.17409	1	Slc1a3
L-Aspartate	cpd:C00049	Mouse salivary gland	1.17409	1	Slc1a3
L-Glutamate	cpd:C00025	Mouse salivary gland	1.17409	1	Slc1a3
L-Glutamine	cpd:C00064	Mouse spleen	1.17084	1	Slc38a5
beta-D-Fructose	cpd:C02336	Mouse adrenal gland	1.16493	1	Slc26a4
D-Fructose	cpd:C00095	Mouse adrenal gland	1.16493	1	Slc26a4
Pyruvate	cpd:C00022	Mouse adipose tissue	1.16126	1	Slc16a7
Acetoacetate	cpd:C00164	Mouse adipose tissue	1.16126	1	Slc16a7
(S)-Lactate	cpd:C00186	Mouse adipose tissue	1.16126	1	Slc16a7
L-Aspartate	cpd:C00049	Mouse adrenal gland	1.15849	1	Slc1a3
L-Glutamate	cpd:C00025	Mouse adrenal gland	1.15849	1	Slc1a3
L-Noradrenaline	cpd:C00547	Mouse adrenal gland	1.15236	1	Slc6a2
Dopamine	cpd:C03758	Mouse adrenal gland	1.15236	1	Slc6a2
Adenosine	cpd:C00212	Mouse ovary	1.13566	1	Slc29a3
Adenine	cpd:C00147	Mouse ovary	1.13566	1	Slc29a3
Inosine	cpd:C00294	Mouse ovary	1.13566	1	Slc29a3
Guanosine	cpd:C00387	Mouse ovary	1.13566	1	Slc29a3
Cytidine	cpd:C00475	Mouse ovary	1.13566	1	Slc29a3
Thymidine	cpd:C00214	Mouse ovary	1.13566	1	Slc29a3
Uridine	cpd:C00299	Mouse ovary	1.13566	1	Slc29a3
L-Serine	cpd:C00065	Mouse heart	1.11145	1	Slc38a4
L-Asparagine	cpd:C00152	Mouse pituitary gland	1.0843	1	Slc38a1
4-Aminobutanoate	cpd:C00334	Mouse pituitary gland	1.07875	1	Slc6a11
Linoleate	cpd:C01595	Mouse lung	1.07849	1	Slc27a5
Tetradecanoic acid	cpd:C06424	Mouse lung	1.07849	1	Slc27a5
(9Z)-Octadecenoic acid	cpd:C00712	Mouse lung	1.07849	1	Slc27a5
Hexadecanoic acid	cpd:C00249	Mouse lung	1.07849	1	Slc27a5
Icosanoic acid	cpd:C06425	Mouse lung	1.07849	1	Slc27a5
(5Z,8Z,11Z,14Z,17Z)-Icosapentaenoic acid	cpd:C06428	Mouse lung	1.07849	1	Slc27a5
Octadecanoic acid	cpd:C01530	Mouse lung	1.07849	1	Slc27a5
Arachidonate	cpd:C00219	Mouse lung	1.07849	1	Slc27a5
Urea	cpd:C00086	Mouse brain	1.06339	1	Slc14a1
Urate	cpd:C00366	Mouse liver	1.06278	1	Slc2a9
Cytidine	cpd:C00475	Mouse small intestine	1.05333	1	Slc28a3
Thymidine	cpd:C00214	Mouse small intestine	1.05333	1	Slc28a3
L-Aspartate	cpd:C00049	Mouse testis	1.02177	1	Slc1a2
L-Glutamate	cpd:C00025	Mouse testis	1.02177	1	Slc1a2
myo-Inositol	cpd:C00137	Mouse placenta	1.00691	1	Slc5a3
Linoleate	cpd:C01595	Mouse placenta	1.00075	1	Slc27a3
Hexadecanoic acid	cpd:C00249	Mouse placenta	1.00075	1	Slc27a3
Arachidonate	cpd:C00219	Mouse placenta	1.00075	1	Slc27a3
L-Glutamate	cpd:C00025	Mouse lung	0.993794	1	Slc1a1
L-Phenylalanine	cpd:C00079	Mouse spleen	0.991031	1	Slc43a1
Biotin	cpd:C00120	Mouse kidney	0.983896	1	Slc5a6
Pantothenate	cpd:C00864	Mouse kidney	0.983896	1	Slc5a6
L-Alanine	cpd:C00041	Mouse testis	0.971604	1	Slc7a6
L-Arginine	cpd:C00062	Mouse testis	0.971604	1	Slc7a6
L-Arginine	cpd:C00062	Mouse adrenal gland	0.95661	1	Slc7a2
Choline	cpd:C00114	Mouse small intestine	0.956073	1	Slc44a1
Pantothenate	cpd:C00864	Mouse adrenal gland	0.950212	1	Slc5a6
L-Ornithine	cpd:C00077	Mouse adrenal gland	0.949339	1	Slc7a1
Pyruvate	cpd:C00022	Mouse eye	0.943645	1	Slc5a8
3',5'-Cyclic GMP	cpd:C00942	Mouse brain	0.930221	1	Slc22a8
3',5'-Cyclic AMP	cpd:C00575	Mouse brain	0.930221	1	Slc22a8
beta-D-Fructose	cpd:C02336	Mouse brain	0.916521	1	Slc26a4
D-Fructose	cpd:C00095	Mouse brain	0.916521	1	Slc26a4
L-Valine	cpd:C00183	Mouse adipose tissue	0.899979	1	Slc7a5
D-Glucosamine	cpd:C00329	Mouse salivary gland	0.8963	1	Slc2a4
Urea	cpd:C00086	Mouse eye	0.881007	1	Slc14a1
Acetoacetate	cpd:C00164	Mouse small intestine	0.867211	1	Slc16a3
(R)-3-Hydroxybutanoate	cpd:C01089	Mouse small intestine	0.867211	1	Slc16a3
myo-Inositol	cpd:C00137	Mouse adrenal gland	0.815091	1	Slc5a3
L-Tyrosine	cpd:C00082	Mouse muscle	0.80935	1	Slc16a10
Creatine	cpd:C00300	Mouse brain	0.798245	1	Slc6a8
Linoleate	cpd:C01595	Mouse pituitary gland	0.785648	1	Slc27a2
(9Z)-Octadecenoic acid	cpd:C00712	Mouse pituitary gland	0.785648	1	Slc27a2
Icosanoic acid	cpd:C06425	Mouse pituitary gland	0.785648	1	Slc27a2
(5Z,8Z,11Z,14Z,17Z)-Icosapentaenoic acid	cpd:C06428	Mouse pituitary gland	0.785648	1	Slc27a2
Octadecanoic acid	cpd:C01530	Mouse pituitary gland	0.785648	1	Slc27a2
Arachidonate	cpd:C00219	Mouse pituitary gland	0.785648	1	Slc27a2
Glycine	cpd:C00037	Mouse salivary gland	0.781977	1	Slc6a9
N-Carbamoyl-L-aspartate	cpd:C00438	Mouse ovary	0.758685	1	Slc1a1
4-Aminobutanoate	cpd:C00334	Mouse bone marrow	0.754819	1	Slc6a13
Linoleate	cpd:C01595	Mouse heart	0.751421	1	Slc27a1
Hexadecanoic acid	cpd:C00249	Mouse heart	0.751421	1	Slc27a1
Arachidonate	cpd:C00219	Mouse heart	0.751421	1	Slc27a1
beta-Alanine	cpd:C00099	Mouse liver	0.744055	1	Slc36a1
L-Proline	cpd:C00148	Mouse liver	0.744055	1	Slc36a1
Inosine	cpd:C00294	Mouse adrenal gland	0.736001	1	Slc29a3
Guanosine	cpd:C00387	Mouse adrenal gland	0.736001	1	Slc29a3
Cytidine	cpd:C00475	Mouse adrenal gland	0.736001	1	Slc29a3
Thymidine	cpd:C00214	Mouse adrenal gland	0.736001	1	Slc29a3
Uridine	cpd:C00299	Mouse adrenal gland	0.736001	1	Slc29a3
L-Noradrenaline	cpd:C00547	Mouse ovary	0.715029	1	Slc22a3
Corticosterone	cpd:C02140	Mouse ovary	0.715029	1	Slc22a3
Estradiol-17beta	cpd:C00951	Mouse ovary	0.715029	1	Slc22a3
Deoxycytidine	cpd:C00881	Mouse placenta	0.709819	1	Slc29a1
Adenosine	cpd:C00212	Mouse placenta	0.709819	1	Slc29a1
Inosine	cpd:C00294	Mouse placenta	0.709819	1	Slc29a1
Deoxyguanosine	cpd:C00330	Mouse placenta	0.709819	1	Slc29a1
Guanosine	cpd:C00387	Mouse placenta	0.709819	1	Slc29a1
Cytidine	cpd:C00475	Mouse placenta	0.709819	1	Slc29a1
Thymidine	cpd:C00214	Mouse placenta	0.709819	1	Slc29a1
Deoxyadenosine	cpd:C00559	Mouse placenta	0.709819	1	Slc29a1
Uridine	cpd:C00299	Mouse placenta	0.709819	1	Slc29a1
Adenosine	cpd:C00212	Mouse brain	0.707746	1	Slc29a4
Fumarate	cpd:C00122	Mouse liver	0.679873	1	Slc13a2
Thiamine	cpd:C00378	Mouse small intestine	0.674903	1	Slc19a3
Pantothenate	cpd:C00864	Mouse small intestine	0.670319	1	Slc5a6
Deoxycytidine	cpd:C00881	Mouse adrenal gland	0.663872	1	Slc29a1
Deoxyguanosine	cpd:C00330	Mouse adrenal gland	0.663872	1	Slc29a1
Deoxyadenosine	cpd:C00559	Mouse adrenal gland	0.663872	1	Slc29a1
Adenosine	cpd:C00212	Mouse testis	0.663571	1	Slc29a4
L-Tryptophan	cpd:C00078	Mouse brain	0.650778	1	Slc7a5
L-Phenylalanine	cpd:C00079	Mouse brain	0.650778	1	Slc7a5
L-Arginine	cpd:C00062	Mouse ovary	0.640399	1	Slc7a6
Pyruvate	cpd:C00022	Mouse lung	0.639312	1	Slc16a7
(S)-Lactate	cpd:C00186	Mouse lung	0.639312	1	Slc16a7
Inosine	cpd:C00294	Mouse testis	0.635296	1	Slc29a1
Deoxyguanosine	cpd:C00330	Mouse testis	0.635296	1	Slc29a1
Guanosine	cpd:C00387	Mouse testis	0.635296	1	Slc29a1
Thymidine	cpd:C00214	Mouse testis	0.635296	1	Slc29a1
Deoxyadenosine	cpd:C00559	Mouse testis	0.635296	1	Slc29a1
Uridine	cpd:C00299	Mouse testis	0.635296	1	Slc29a1
Urate	cpd:C00366	Mouse small intestine	0.630177	1	Slc2a9
D-Galactose	cpd:C00124	Mouse adipose tissue	0.606324	1	Slc2a3
Butanoic acid	cpd:C00246	Mouse lung	0.606213	1	Slc5a12
Cytidine	cpd:C00475	Mouse salivary gland	0.600762	1	Slc29a3
Uridine	cpd:C00299	Mouse salivary gland	0.600762	1	Slc29a3
Estradiol-17beta 3-glucuronide	cpd:C05503	Mouse lung	0.59731	1	Slco1a1
beta-D-Fructose	cpd:C02336	Mouse heart	0.564044	1	Slc2a8
D-Fructose	cpd:C00095	Mouse heart	0.564044	1	Slc2a8
Adenosine	cpd:C00212	Mouse lung	0.553931	1	Slc29a1
Inosine	cpd:C00294	Mouse lung	0.553931	1	Slc29a1
Guanosine	cpd:C00387	Mouse lung	0.553931	1	Slc29a1
Cytidine	cpd:C00475	Mouse lung	0.553931	1	Slc29a1
Uridine	cpd:C00299	Mouse lung	0.553931	1	Slc29a1
Adenine	cpd:C00147	Mouse testis	0.549036	1	Slc29a3
Estradiol-17beta	cpd:C00951	Mouse lung	0.531645	1	Slc22a1
Deoxycytidine	cpd:C00881	Mouse pituitary gland	0.518236	1	Slc29a1
Adenosine	cpd:C00212	Mouse pituitary gland	0.518236	1	Slc29a1
Inosine	cpd:C00294	Mouse pituitary gland	0.518236	1	Slc29a1
Guanosine	cpd:C00387	Mouse pituitary gland	0.518236	1	Slc29a1
Cytidine	cpd:C00475	Mouse pituitary gland	0.518236	1	Slc29a1
Thymidine	cpd:C00214	Mouse pituitary gland	0.518236	1	Slc29a1
Deoxyadenosine	cpd:C00559	Mouse pituitary gland	0.518236	1	Slc29a1
Uridine	cpd:C00299	Mouse pituitary gland	0.518236	1	Slc29a1
beta-D-Fructose	cpd:C02336	Mouse muscle	0.51465	1	Slc2a8
D-Fructose	cpd:C00095	Mouse muscle	0.51465	1	Slc2a8
Linoleate	cpd:C01595	Mouse testis	0.491194	1	Slc27a3
Arachidonate	cpd:C00219	Mouse testis	0.491194	1	Slc27a3
Adenosine	cpd:C00212	Mouse eye	0.480627	1	Slc29a4
Deoxycytidine	cpd:C00881	Mouse bone marrow	0.466389	1	Slc29a1
Deoxyguanosine	cpd:C00330	Mouse bone marrow	0.466389	1	Slc29a1
Cytidine	cpd:C00475	Mouse bone marrow	0.466389	1	Slc29a1
Thymidine	cpd:C00214	Mouse bone marrow	0.466389	1	Slc29a1
Deoxyadenosine	cpd:C00559	Mouse bone marrow	0.466389	1	Slc29a1
Inosine	cpd:C00294	Mouse eye	0.415869	1	Slc29a2
Guanosine	cpd:C00387	Mouse eye	0.415869	1	Slc29a2
L-Glutamate	cpd:C00025	Mouse spleen	0.400098	1	Slc7a11
(9Z)-Octadecenoic acid	cpd:C00712	Mouse liver	8.4809	2	Slc27a5
Dodecanoic acid	cpd:C02679	Mouse liver	8.4809	2	Slc27a5
(9Z)-Hexadecenoic acid	cpd:C08362	Mouse liver	8.4809	2	Slc27a5
Icosanoic acid	cpd:C06425	Mouse liver	8.4809	2	Slc27a5
(5Z,8Z,11Z,14Z,17Z)-Icosapentaenoic acid	cpd:C06428	Mouse liver	8.4809	2	Slc27a5
Myristoleic acid	cpd:C08322	Mouse liver	8.4809	2	Slc27a5
Octadecanoic acid	cpd:C01530	Mouse liver	8.4809	2	Slc27a5
Tetradecanoic acid	cpd:C06424	Mouse kidney	8.31746	2	Slc27a2
(9Z)-Octadecenoic acid	cpd:C00712	Mouse kidney	8.31746	2	Slc27a2
Dodecanoic acid	cpd:C02679	Mouse kidney	8.31746	2	Slc27a2
(9Z)-Hexadecenoic acid	cpd:C08362	Mouse kidney	8.31746	2	Slc27a2
Icosanoic acid	cpd:C06425	Mouse kidney	8.31746	2	Slc27a2
(5Z,8Z,11Z,14Z,17Z)-Icosapentaenoic acid	cpd:C06428	Mouse kidney	8.31746	2	Slc27a2
Myristoleic acid	cpd:C08322	Mouse kidney	8.31746	2	Slc27a2
Octadecanoic acid	cpd:C01530	Mouse kidney	8.31746	2	Slc27a2
Hydantoin-5-propionate	cpd:C05565	Mouse liver	7.56105	2	Slc10a1
Tauroursodeoxycholic acid	cpd:C16868	Mouse liver	7.56105	2	Slc10a1
Taurodeoxycholate	cpd:C05463	Mouse liver	7.56105	2	Slc10a1
L-Asparagine	cpd:C00152	Mouse liver	7.2464	2	Slc38a4
HCO3-	cpd:C00288	Mouse bone marrow	7.23	2	Slc4a1
D-Mannose	cpd:C00159	Mouse liver	7.18862	2	Slc2a2
Estrone 3-sulfate	cpd:C02538	Mouse liver	7.06896	2	Slco1b2
L-Alanine	cpd:C00041	Mouse placenta	7.04202	2	Slc38a4
L-Methionine	cpd:C00073	Mouse placenta	7.04202	2	Slc38a4
L-Asparagine	cpd:C00152	Mouse placenta	7.04202	2	Slc38a4
Urate	cpd:C00366	Mouse kidney	6.91928	2	Slc22a12
L-Lysine	cpd:C00047	Mouse small intestine	6.91834	2	Slc7a9
Cystine	cpd:C01420	Mouse small intestine	6.91834	2	Slc7a9
D-Glucosamine	cpd:C00329	Mouse kidney	6.74887	2	Slc2a2
D-Mannose	cpd:C00159	Mouse kidney	6.74887	2	Slc2a2
Oxalate	cpd:C00209	Mouse kidney	6.58449	2	Slc22a7
Salicylate	cpd:C00805	Mouse kidney	6.58449	2	Slc22a7
Malonate	cpd:C00383	Mouse kidney	6.58449	2	Slc22a7
Cystine	cpd:C01420	Mouse kidney	6.38552	2	Slc7a9
Prostaglandin F2alpha	cpd:C00639	Mouse kidney	6.37994	2	Slc22a2
Choline	cpd:C00114	Mouse kidney	6.37994	2	Slc22a2
L-Isoleucine	cpd:C00407	Mouse small intestine	6.30811	2	Slc6a19
L-Methionine	cpd:C00073	Mouse small intestine	6.30811	2	Slc6a19
L-Asparagine	cpd:C00152	Mouse small intestine	6.30811	2	Slc6a19
L-Valine	cpd:C00183	Mouse small intestine	6.30811	2	Slc6a19
Pentanoate	cpd:C00803	Mouse kidney	6.22345	2	Slc5a8
cis-4-Hydroxy-L-proline	cpd:C01015	Mouse kidney	6.17676	2	Slc6a20b
Thyroxine	cpd:C01829	Mouse testis	5.94268	2	Slco6c1
Taurocholate	cpd:C05122	Mouse testis	5.94268	2	Slco6c1
Triiodothyronine	cpd:C02465	Mouse testis	5.94268	2	Slco6c1
Dehydroepiandrosterone sulfate	cpd:C04555	Mouse testis	5.94268	2	Slco6c1
D-Xylose	cpd:C00181	Mouse testis	5.90384	2	Slc2a3
D-Galactose	cpd:C00124	Mouse testis	5.90384	2	Slc2a3
Dehydroascorbate	cpd:C05422	Mouse testis	5.90384	2	Slc2a3
L-Methionine	cpd:C00073	Mouse kidney	5.85177	2	Slc6a18
Oligopeptide	cpd:C00098	Mouse small intestine	5.80083	2	Slc15a1
Dehydroascorbate	cpd:C05422	Mouse muscle	5.71853	2	Slc2a4
Alprostadil	cpd:C04741	Mouse placenta	5.61789	2	Slco2a1
Thromboxane B2	cpd:C05963	Mouse placenta	5.61789	2	Slco2a1
N-Carbamoyl-L-aspartate	cpd:C00438	Mouse kidney	5.57476	2	Slc1a1
L-Asparagine	cpd:C00152	Mouse kidney	5.52646	2	Slc6a19
Dehydroascorbate	cpd:C05422	Mouse placenta	5.47703	2	Slc2a1
Dehydroascorbate	cpd:C05422	Mouse heart	5.13371	2	Slc2a4
Alprostadil	cpd:C04741	Mouse lung	5.09448	2	Slco2a1
Thromboxane B2	cpd:C05963	Mouse lung	5.09448	2	Slco2a1
Ascorbate	cpd:C00072	Mouse kidney	5.04139	2	Slc23a1
L-Leucine	cpd:C00123	Mouse small intestine	4.98057	2	Slc7a7
D-Aspartate	cpd:C00402	Mouse brain	4.77624	2	Slc1a3
L-Lysine	cpd:C00047	Mouse muscle	4.75175	2	Slc38a4
L-Serine	cpd:C00065	Mouse muscle	4.75175	2	Slc38a4
L-Arginine	cpd:C00062	Mouse muscle	4.75175	2	Slc38a4
L-Methionine	cpd:C00073	Mouse muscle	4.75175	2	Slc38a4
L-Asparagine	cpd:C00152	Mouse muscle	4.75175	2	Slc38a4
L-Methionine	cpd:C00073	Mouse brain	4.74154	2	Slc6a15
L-Proline	cpd:C00148	Mouse brain	4.74154	2	Slc6a15
Estrone 3-sulfate	cpd:C02538	Mouse kidney	4.66841	2	Slc22a8
Dehydroepiandrosterone sulfate	cpd:C04555	Mouse kidney	4.66841	2	Slc22a8
(9Z)-Octadecenoic acid	cpd:C00712	Mouse adrenal gland	4.55421	2	Slc27a3
Dodecanoic acid	cpd:C02679	Mouse adrenal gland	4.55421	2	Slc27a3
(9Z)-Hexadecenoic acid	cpd:C08362	Mouse adrenal gland	4.55421	2	Slc27a3
Icosanoic acid	cpd:C06425	Mouse adrenal gland	4.55421	2	Slc27a3
(5Z,8Z,11Z,14Z,17Z)-Icosapentaenoic acid	cpd:C06428	Mouse adrenal gland	4.55421	2	Slc27a3
Myristoleic acid	cpd:C08322	Mouse adrenal gland	4.55421	2	Slc27a3
Octadecanoic acid	cpd:C01530	Mouse adrenal gland	4.55421	2	Slc27a3
L-Threonine	cpd:C00188	Mouse adipose tissue	4.46903	2	Slc7a10
D-Serine	cpd:C00740	Mouse adipose tissue	4.46903	2	Slc7a10
Butanoic acid	cpd:C00246	Mouse salivary gland	4.44582	2	Slc5a8
Pentanoate	cpd:C00803	Mouse salivary gland	4.44582	2	Slc5a8
HCO3-	cpd:C00288	Mouse spleen	4.43805	2	Slc4a1
Thyroxine	cpd:C01829	Mouse placenta	4.36217	2	Slco4a1
Taurocholate	cpd:C05122	Mouse placenta	4.36217	2	Slco4a1
Triiodothyronine	cpd:C02465	Mouse placenta	4.36217	2	Slco4a1
L-Leucine	cpd:C00123	Mouse bone marrow	4.23553	2	Slc43a1
Estrone 3-sulfate	cpd:C02538	Mouse eye	4.22147	2	Slco4a1
Thyroxine	cpd:C01829	Mouse eye	4.22147	2	Slco4a1
Taurocholate	cpd:C05122	Mouse eye	4.22147	2	Slco4a1
Triiodothyronine	cpd:C02465	Mouse eye	4.22147	2	Slco4a1
Acetone	cpd:C00207	Mouse muscle	4.19749	2	Slc16a3
Thyroxine	cpd:C01829	Mouse liver	4.18537	2	Slco1a1
Triiodothyronine	cpd:C02465	Mouse liver	4.18537	2	Slco1a1
Tetradecanoic acid	cpd:C06424	Mouse salivary gland	4.11129	2	Slc27a2
(9Z)-Octadecenoic acid	cpd:C00712	Mouse salivary gland	4.11129	2	Slc27a2
Hexadecanoic acid	cpd:C00249	Mouse salivary gland	4.11129	2	Slc27a2
Dodecanoic acid	cpd:C02679	Mouse salivary gland	4.11129	2	Slc27a2
(9Z)-Hexadecenoic acid	cpd:C08362	Mouse salivary gland	4.11129	2	Slc27a2
Icosanoic acid	cpd:C06425	Mouse salivary gland	4.11129	2	Slc27a2
(5Z,8Z,11Z,14Z,17Z)-Icosapentaenoic acid	cpd:C06428	Mouse salivary gland	4.11129	2	Slc27a2
Myristoleic acid	cpd:C08322	Mouse salivary gland	4.11129	2	Slc27a2
Octadecanoic acid	cpd:C01530	Mouse salivary gland	4.11129	2	Slc27a2
L-Lysine	cpd:C00047	Mouse lung	4.06582	2	Slc6a14
L-Leucine	cpd:C00123	Mouse lung	4.06582	2	Slc6a14
L-Asparagine	cpd:C00152	Mouse lung	4.06582	2	Slc6a14
L-Threonine	cpd:C00188	Mouse lung	4.06582	2	Slc6a14
L-Proline	cpd:C00148	Mouse lung	4.06582	2	Slc6a14
L-Carnitine	cpd:C00318	Mouse testis	4.01393	2	Slc22a16
Betaine	cpd:C00719	Mouse placenta	4.00625	2	Slc6a12
Tetradecanoic acid	cpd:C06424	Mouse small intestine	3.98129	2	Slc27a2
(9Z)-Octadecenoic acid	cpd:C00712	Mouse small intestine	3.98129	2	Slc27a2
Dodecanoic acid	cpd:C02679	Mouse small intestine	3.98129	2	Slc27a2
(9Z)-Hexadecenoic acid	cpd:C08362	Mouse small intestine	3.98129	2	Slc27a2
Icosanoic acid	cpd:C06425	Mouse small intestine	3.98129	2	Slc27a2
(5Z,8Z,11Z,14Z,17Z)-Icosapentaenoic acid	cpd:C06428	Mouse small intestine	3.98129	2	Slc27a2
Myristoleic acid	cpd:C08322	Mouse small intestine	3.98129	2	Slc27a2
Octadecanoic acid	cpd:C01530	Mouse small intestine	3.98129	2	Slc27a2
L-Asparagine	cpd:C00152	Mouse ovary	3.87783	2	Slc38a5
L-Serine	cpd:C00065	Mouse bone marrow	3.81005	2	Slc38a5
D-Aspartate	cpd:C00402	Mouse adipose tissue	3.73981	2	Slc1a3
(R)-3-Hydroxybutanoate	cpd:C01089	Mouse testis	3.73038	2	Slc16a7
Acetone	cpd:C00207	Mouse testis	3.73038	2	Slc16a7
Prostaglandin A2	cpd:C05953	Mouse kidney	3.72434	2	Slc22a6
L-Histidine	cpd:C00135	Mouse salivary gland	3.72161	2	Slc7a5
L-Tryptophan	cpd:C00078	Mouse salivary gland	3.72161	2	Slc7a5
L-Methionine	cpd:C00073	Mouse salivary gland	3.72161	2	Slc7a5
L-Phenylalanine	cpd:C00079	Mouse salivary gland	3.72161	2	Slc7a5
3,4-Dihydroxy-L-phenylalanine	cpd:C00355	Mouse salivary gland	3.72161	2	Slc7a5
L-Tyrosine	cpd:C00082	Mouse salivary gland	3.72161	2	Slc7a5
Thyroxine	cpd:C01829	Mouse brain	3.68862	2	Slco1c1
Triiodothyronine	cpd:C02465	Mouse brain	3.68862	2	Slco1c1
Dehydroascorbate	cpd:C05422	Mouse adipose tissue	3.63382	2	Slc2a4
D-Glucose	cpd:C00031	Mouse adipose tissue	3.63382	2	Slc2a4
Thyroxine	cpd:C01829	Mouse kidney	3.57564	2	Slco1a1
Taurocholate	cpd:C05122	Mouse kidney	3.57564	2	Slco1a1
Triiodothyronine	cpd:C02465	Mouse kidney	3.57564	2	Slco1a1
N-Carbamoyl-L-aspartate	cpd:C00438	Mouse brain	3.57141	2	Slc1a1
L-Methionine	cpd:C00073	Mouse eye	3.49592	2	Slc6a15
L-Proline	cpd:C00148	Mouse eye	3.49592	2	Slc6a15
Lipoate	cpd:C00725	Mouse placenta	3.42002	2	Slc5a6
Acetoacetate	cpd:C00164	Mouse placenta	3.34961	2	Slc16a3
(R)-3-Hydroxybutanoate	cpd:C01089	Mouse placenta	3.34961	2	Slc16a3
Acetone	cpd:C00207	Mouse placenta	3.34961	2	Slc16a3
L-Phenylalanine	cpd:C00079	Mouse placenta	3.2518	2	Slc7a5
3,4-Dihydroxy-L-phenylalanine	cpd:C00355	Mouse placenta	3.2518	2	Slc7a5
L-Tyrosine	cpd:C00082	Mouse placenta	3.2518	2	Slc7a5
Prostaglandin H2	cpd:C00427	Mouse liver	3.23761	2	Slco2a1
Alprostadil	cpd:C04741	Mouse liver	3.23761	2	Slco2a1
Thromboxane B2	cpd:C05963	Mouse liver	3.23761	2	Slco2a1
(S)-Carnitine	cpd:C15025	Mouse kidney	3.202	2	Slc22a5
L-Carnitine	cpd:C00318	Mouse kidney	3.202	2	Slc22a5
O-Acetylcarnitine	cpd:C02571	Mouse kidney	3.202	2	Slc22a5
Acetylcholine	cpd:C01996	Mouse placenta	3.17639	2	Slc22a3
D-Xylose	cpd:C00181	Mouse bone marrow	3.16199	2	Slc2a3
D-Galactose	cpd:C00124	Mouse bone marrow	3.16199	2	Slc2a3
Dehydroascorbate	cpd:C05422	Mouse bone marrow	3.16199	2	Slc2a3
Acetylcholine	cpd:C01996	Mouse adipose tissue	3.1246	2	Slc22a3
Estrone 3-sulfate	cpd:C02538	Mouse lung	3.12307	2	Slc10a6
D-Aspartate	cpd:C00402	Mouse eye	3.09553	2	Slc1a7
N-Carbamoyl-L-aspartate	cpd:C00438	Mouse eye	3.09553	2	Slc1a7
D-Xylose	cpd:C00181	Mouse brain	3.02956	2	Slc2a3
Dehydroascorbate	cpd:C05422	Mouse brain	3.02956	2	Slc2a3
(9Z)-Hexadecenoic acid	cpd:C08362	Mouse adipose tissue	3.0145	2	Slc27a1
Icosanoic acid	cpd:C06425	Mouse adipose tissue	3.0145	2	Slc27a1
(5Z,8Z,11Z,14Z,17Z)-Icosapentaenoic acid	cpd:C06428	Mouse adipose tissue	3.0145	2	Slc27a1
Myristoleic acid	cpd:C08322	Mouse adipose tissue	3.0145	2	Slc27a1
Oxalate	cpd:C00209	Mouse liver	2.98113	2	Slc22a7
Salicylate	cpd:C00805	Mouse liver	2.98113	2	Slc22a7
Malonate	cpd:C00383	Mouse liver	2.98113	2	Slc22a7
Thyroxine	cpd:C01829	Mouse salivary gland	2.95844	2	Slco1a5
Taurocholate	cpd:C05122	Mouse salivary gland	2.95844	2	Slco1a5
Triiodothyronine	cpd:C02465	Mouse salivary gland	2.95844	2	Slco1a5
Dehydroascorbate	cpd:C05422	Mouse eye	2.83166	2	Slc2a1
Cystine	cpd:C01420	Mouse placenta	2.79985	2	Slc7a9
Triiodothyronine	cpd:C02465	Mouse lung	2.7914	2	Slco4c1
Alprostadil	cpd:C04741	Mouse small intestine	2.74895	2	Slco2a1
Thromboxane B2	cpd:C05963	Mouse small intestine	2.74895	2	Slco2a1
Pentanoate	cpd:C00803	Mouse small intestine	2.71547	2	Slc5a8
L-Alanine	cpd:C00041	Mouse brain	2.64815	2	Slc6a17
L-Leucine	cpd:C00123	Mouse testis	2.63689	2	Slc7a5
3,4-Dihydroxy-L-phenylalanine	cpd:C00355	Mouse testis	2.63689	2	Slc7a5
Alprostadil	cpd:C04741	Mouse kidney	2.62875	2	Slco3a1
Cortisol	cpd:C00735	Mouse brain	2.58462	2	Slco1a4
Taurocholate	cpd:C05122	Mouse brain	2.58462	2	Slco1a4
Estradiol-17beta 3-glucuronide	cpd:C05503	Mouse brain	2.58462	2	Slco1a4
Oligopeptide	cpd:C00098	Mouse kidney	2.55323	2	Slc15a2
myo-Inositol	cpd:C00137	Mouse pituitary gland	2.52146	2	Slc2a13
1D-myo-Inositol 3-phosphate	cpd:C04006	Mouse pituitary gland	2.52146	2	Slc2a13
D-Galactose	cpd:C00124	Mouse salivary gland	2.49647	2	Slc5a1
D-Glucose	cpd:C00031	Mouse salivary gland	2.49647	2	Slc5a1
D-Aspartate	cpd:C00402	Mouse small intestine	2.41451	2	Slc1a1
N-Carbamoyl-L-aspartate	cpd:C00438	Mouse small intestine	2.41451	2	Slc1a1
Cortisol	cpd:C00735	Mouse eye	2.38403	2	Slco1a4
Estradiol-17beta 3-glucuronide	cpd:C05503	Mouse eye	2.38403	2	Slco1a4
Acetone	cpd:C00207	Mouse kidney	2.31328	2	Slc16a7
Triiodothyronine	cpd:C02465	Mouse bone marrow	2.29157	2	Slco4c1
Serotonin	cpd:C00780	Mouse bone marrow	2.22217	2	Slc6a4
Alprostadil	cpd:C04741	Mouse ovary	2.21885	2	Slco2a1
Thromboxane B2	cpd:C05963	Mouse ovary	2.21885	2	Slco2a1
Glycochenodeoxycholate	cpd:C05466	Mouse kidney	2.17331	2	Slc10a2
Ursodiol	cpd:C07880	Mouse kidney	2.17331	2	Slc10a2
Hydantoin-5-propionate	cpd:C05565	Mouse kidney	2.17331	2	Slc10a2
Tauroursodeoxycholic acid	cpd:C16868	Mouse kidney	2.17331	2	Slc10a2
Taurodeoxycholate	cpd:C05463	Mouse kidney	2.17331	2	Slc10a2
Deoxycholic acid	cpd:C04483	Mouse kidney	2.17331	2	Slc10a2
Glycodeoxycholate	cpd:C05464	Mouse kidney	2.17331	2	Slc10a2
Ursodiol	cpd:C07880	Mouse liver	2.13799	2	Slc10a2
Deoxycholic acid	cpd:C04483	Mouse liver	2.13799	2	Slc10a2
Glycodeoxycholate	cpd:C05464	Mouse liver	2.13799	2	Slc10a2
Alprostadil	cpd:C04741	Mouse heart	2.11634	2	Slco3a1
Ascorbate	cpd:C00072	Mouse salivary gland	2.11255	2	Slc23a1
Dehydroascorbate	cpd:C05422	Mouse adrenal gland	2.08571	2	Slc2a4
L-Threonine	cpd:C00188	Mouse placenta	2.06469	2	Slc7a8
(S)-Lactate	cpd:C00186	Mouse eye	2.02094	2	Slc16a8
Glycochenodeoxycholate	cpd:C05466	Mouse small intestine	1.97661	2	Slc10a2
Ursodiol	cpd:C07880	Mouse small intestine	1.97661	2	Slc10a2
Hydantoin-5-propionate	cpd:C05565	Mouse small intestine	1.97661	2	Slc10a2
Taurocholate	cpd:C05122	Mouse small intestine	1.97661	2	Slc10a2
Tauroursodeoxycholic acid	cpd:C16868	Mouse small intestine	1.97661	2	Slc10a2
Taurodeoxycholate	cpd:C05463	Mouse small intestine	1.97661	2	Slc10a2
Deoxycholic acid	cpd:C04483	Mouse small intestine	1.97661	2	Slc10a2
Glycodeoxycholate	cpd:C05464	Mouse small intestine	1.97661	2	Slc10a2
L-Tryptophan	cpd:C00078	Mouse ovary	1.96534	2	Slc7a5
L-Phenylalanine	cpd:C00079	Mouse ovary	1.96534	2	Slc7a5
3,4-Dihydroxy-L-phenylalanine	cpd:C00355	Mouse ovary	1.96534	2	Slc7a5
L-Tyrosine	cpd:C00082	Mouse ovary	1.96534	2	Slc7a5
HCO3-	cpd:C00288	Mouse kidney	1.95898	2	Slc4a1
L-Threonine	cpd:C00188	Mouse ovary	1.95155	2	Slc1a5
L-Asparagine	cpd:C00152	Mouse eye	1.95143	2	Slc38a3
D-Glucosamine	cpd:C00329	Mouse ovary	1.937	2	Slc2a4
Dehydroascorbate	cpd:C05422	Mouse ovary	1.937	2	Slc2a4
D-Glucose	cpd:C00031	Mouse ovary	1.937	2	Slc2a4
Acetone	cpd:C00207	Mouse liver	1.93047	2	Slc16a7
(S)-Lactate	cpd:C00186	Mouse liver	1.93047	2	Slc16a7
D-Aspartate	cpd:C00402	Mouse ovary	1.93044	2	Slc1a3
Biotin	cpd:C00120	Mouse adipose tissue	1.90387	2	Slc5a6
Lipoate	cpd:C00725	Mouse adipose tissue	1.90387	2	Slc5a6
Urea	cpd:C00086	Mouse spleen	1.8812	2	Slc14a1
L-Threonine	cpd:C00188	Mouse brain	1.85795	2	Slc7a10
D-Xylose	cpd:C00181	Mouse placenta	1.84647	2	Slc2a3
D-Mannose	cpd:C00159	Mouse ovary	1.84521	2	Slc2a3
L-Lysine	cpd:C00047	Mouse adipose tissue	1.82493	2	Slc7a9
Cystine	cpd:C01420	Mouse adipose tissue	1.82493	2	Slc7a9
D-Serine	cpd:C00740	Mouse lung	1.79179	2	Slc7a10
(S)-Carnitine	cpd:C15025	Mouse placenta	1.76549	2	Slc22a5
L-Carnitine	cpd:C00318	Mouse placenta	1.76549	2	Slc22a5
O-Acetylcarnitine	cpd:C02571	Mouse placenta	1.76549	2	Slc22a5
Thyroxine	cpd:C01829	Mouse ovary	1.74239	2	Slc16a2
Triiodothyronine	cpd:C02465	Mouse ovary	1.74239	2	Slc16a2
L-Alanine	cpd:C00041	Mouse pituitary gland	1.71634	2	Slc6a17
L-Serine	cpd:C00065	Mouse pituitary gland	1.71634	2	Slc6a17
L-Cysteine	cpd:C00097	Mouse pituitary gland	1.71634	2	Slc6a17
Oligopeptide	cpd:C00098	Mouse eye	1.70424	2	Slc15a2
HCO3-	cpd:C00288	Mouse placenta	1.67805	2	Slc4a1
5-Methyltetrahydrofolate	cpd:C00440	Mouse kidney	1.66191	2	Slc19a1
Ascorbate	cpd:C00072	Mouse small intestine	1.65616	2	Slc23a1
L-Lysine	cpd:C00047	Mouse brain	1.63781	2	Slc7a3
L-Threonine	cpd:C00188	Mouse bone marrow	1.63674	2	Slc1a5
HCO3-	cpd:C00288	Mouse ovary	1.58194	2	Slc4a2
Alprostadil	cpd:C04741	Mouse adipose tissue	1.56673	2	Slco2a1
Thromboxane B2	cpd:C05963	Mouse adipose tissue	1.56673	2	Slco2a1
3,4-Dihydroxy-L-phenylalanine	cpd:C00355	Mouse bone marrow	1.55414	2	Slc7a5
Ascorbate	cpd:C00072	Mouse brain	1.54387	2	Slc23a2
Thiamine	cpd:C00378	Mouse placenta	1.51809	2	Slc19a2
L-Lysine	cpd:C00047	Mouse eye	1.51334	2	Slc6a14
L-Serine	cpd:C00065	Mouse eye	1.51334	2	Slc6a14
L-Cysteine	cpd:C00097	Mouse eye	1.51334	2	Slc6a14
L-Threonine	cpd:C00188	Mouse eye	1.51334	2	Slc6a14
Acetoacetate	cpd:C00164	Mouse bone marrow	1.50927	2	Slc16a3
(R)-3-Hydroxybutanoate	cpd:C01089	Mouse bone marrow	1.50927	2	Slc16a3
Acetone	cpd:C00207	Mouse bone marrow	1.50927	2	Slc16a3
